# Supplementary material
Source: PubMed Central journal article supplement (PMC8410667)
Supplement: NIHMS1709481-supplement-Supplemental_1.pdf [file NIHMS1709481-supplement-Supplemental_1.pdf]

**SUPPLEMENTAL FILE 1.** Summary of Missing Data.

| Variable                     | N   | Total Missing (count) | Missing from Activity-dominant (count) | Missing from Psychosocial-dominant (count) | Missing from Structure-dominant (count) |
|------------------------------|-----|-----------------------|----------------------------------------|--------------------------------------------|-----------------------------------------|
| BMI                          | 144 | 1                     | 0                                      | 1                                          | 0                                       |
| Counter movement Jump        | 109 | 36                    | 7                                      | 19                                         | 10                                      |
| Tendon CSA                   | 143 | 2                     | 1                                      | 0                                          | 1                                       |
| Drop Counter movement Jump   | 90  | 55                    | 10                                     | 30                                         | 15                                      |
| FAOS-QoL                     | 144 | 1                     | 1                                      | 0                                          | 0                                       |
| Pain with Hopping            | 77  | 68                    | 21                                     | 32                                         | 15                                      |
| Heel-rise Work               | 139 | 6                     | 1                                      | 3                                          | 2                                       |
| Physical Activity Scale      | 144 | 1                     | 1                                      | 0                                          | 0                                       |
| Pain Catastrophizing Scale   | 142 | 3                     | 2                                      | 1                                          | 0                                       |
| Shear Modulus                | 125 | 20                    | 6                                      | 10                                         | 4                                       |
| Symptom Duration             | 138 | 7                     | 4                                      | 2                                          | 1                                       |
| Tendon Thickness             | 144 | 1                     | 1                                      | 0                                          | 0                                       |
| Tampa Scale of Kinesiophobia | 134 | 11                    | 3                                      | 4                                          | 4                                       |
| VISA-A                       | 138 | 7                     | 2                                      | 1                                          | 4                                       |
| Viscosity                    | 125 | 20                    | 6                                      | 10                                         | 4                                       |
| Age                          | 145 | 0                     | 0                                      | 0                                          | 0                                       |
| Sex                          | 145 | 0                     | 0                                      | 0                                          | 0                                       |

*Abbreviations: BMI, Body Mass Index; CSA, cross-sectional area; FAOS-QoL, Foot and Ankle Outcomes Survey: Quality of Life; VISA-A, Victorian Institute of Sport Assessment- Achilles.*
