# Supplementary material
Source: PubMed Central journal article supplement (PMC8410667)
Supplement: NIHMS1709481-supplement-Supplemental_2.pdf [file NIHMS1709481-supplement-Supplemental_2.pdf]

**SUPPLEMENTARY FILE 2.** Summary of Fit Statistics Indicating a 3-Subgroup Model is Best-Fitting.

| <i>Fit Statistic</i> | <i>2-subgroup</i> | <i>3-subgroup</i>  | <i>4-subgroup</i> |
|----------------------|-------------------|--------------------|-------------------|
| <b>AIC</b>           | 12736.371         | <b>11736.4</b>     | 12586.82          |
| <b>BIC</b>           | 12873.3           | <b>11909.05</b>    | 12819.01          |
| <b>ABIC</b>          | 12727.74          | <b>11725.516</b>   | 12572.19          |
| <b>Entropy</b>       | 0.916             | <b>0.899</b>       | 0.889             |
| <b>VLMR Test</b>     | p < 0.001         | <b>p = 0.16</b>    | p = 0.63          |
| <b>AVLMR Test</b>    | p < 0.001         | <b>p = 0.16</b>    | p = 0.62          |
| <b>BLR Test</b>      | p <0.001          | <b>p &lt;0.001</b> | p <0.001          |

*Abbreviations: AIC, Akaike Information Criterion; BIC, Bayesian Information Criterion; ABIC, Sample-adjusted Bayesian Information Criteria; VLMR, Vuong-Lo-Mendell Rubin; AVLMR, Sample-adjusted Vuong-Lo-Mendell Rubin; BLR, Bootstrap Likelihood Ratio.*
